# Supplementary material for: Barriers and facilitators to the implementation of a new European eHealth solution (SurPass v2.0): the PanCareSurPass Open Space study
Source: Springer Nature journal article supplement (doi:10.1007/s11764-023-01498-8), 2023-11-28
Supplement: MOESM1 [file 11764_2023_1498_MOESM1_ESM.pdf]

**Supplementary Table 1. All barriers and facilitators for the implementation of SurPass.**

| Action Fields | Themes                 | Barriers                                                                                                                                                                                                                                                                                                                                                                                                                                                                                                                                                                                                                                                                                                                                                                                                                                                                                                                                                                           | Facilitators                                                                                                                                                                                                                                                                                                                                                                                                                                                                                                                                                                                                                                                                                                                                                                                                              |
|---------------|------------------------|------------------------------------------------------------------------------------------------------------------------------------------------------------------------------------------------------------------------------------------------------------------------------------------------------------------------------------------------------------------------------------------------------------------------------------------------------------------------------------------------------------------------------------------------------------------------------------------------------------------------------------------------------------------------------------------------------------------------------------------------------------------------------------------------------------------------------------------------------------------------------------------------------------------------------------------------------------------------------------|---------------------------------------------------------------------------------------------------------------------------------------------------------------------------------------------------------------------------------------------------------------------------------------------------------------------------------------------------------------------------------------------------------------------------------------------------------------------------------------------------------------------------------------------------------------------------------------------------------------------------------------------------------------------------------------------------------------------------------------------------------------------------------------------------------------------------|
| Care          | Organisational context | <ul style="list-style-type: none"> <li>• There are too many guidelines for LTFU care for CCSs <sup>a</sup></li> <li>• Lack of good guidance on child-adult care transition <sup>b</sup></li> <li>• Lack of monitoring LTFU attendance <sup>b</sup></li> <li>• Uncertainty about how CCSs will be contacted to introduce SurPass <sup>b</sup></li> <li>• Management of diseases takes much time and resources for CCSs and their relatives <sup>c</sup></li> <li>• Lack of LTFU care and network cooperation <sup>b,c,e,f</sup></li> <li>• GP should be linked to LTFU care HCPs <sup>c</sup></li> <li>• Lack of interdisciplinary contact points for CCSs for psychological late effects <sup>c</sup></li> </ul>                                                                                                                                                                                                                                                                   | <ul style="list-style-type: none"> <li>• Importance of psychosocial aspects to be discussed with the psychologist/social worker <sup>a</sup></li> <li>• CCSs should be introduced to SurPass at the end of treatment <sup>b</sup></li> <li>• Standardised and centralised LTFU care <sup>b,c,d,e,f</sup></li> <li>• CCSs trying to manage the LTFU care (e.g. medication and consults) themselves experience difficulty regarding documentation <sup>c</sup></li> <li>• Less complicated requirements to obtain LTFU care documents <sup>c</sup></li> <li>• SurPass should be included in transition towards adult care <sup>c,d</sup></li> <li>• Delivery of SurPass through LTFU clinic <sup>c</sup></li> <li>• Clinic needs to support informing the CCSs or relatives and hand over a SurPass <sup>c</sup></li> </ul> |
|               |                        | <ul style="list-style-type: none"> <li>• Lack of LTFU care after 5 years post-treatment in Germany <sup>c</sup></li> <li>• Lack of a standard way of how paediatric oncologists work <sup>c</sup></li> <li>• Uncertainty if a single centre for LTFU care is feasible <sup>c</sup></li> <li>• Lack of checklist/guideline on how to best communicate late effects <sup>c</sup></li> <li>• Requirement of a referral for a medical specialist is needed <sup>e</sup></li> <li>• Referrals should be clearer <sup>e</sup></li> <li>• Lack of monitoring of health conditions <sup>e</sup></li> <li>• Lack of single functioning centre for LTFU care <sup>e</sup></li> <li>• Lack of shared care institutions <sup>e</sup></li> <li>• Lack of follow-up visits for late effect screening only <sup>f</sup></li> <li>• Too little CCSs for each quota of primary care doctors <sup>f</sup></li> <li>• LTFU care included in research instead of health system <sup>f</sup></li> </ul> | <ul style="list-style-type: none"> <li>• Provide care structures <sup>c</sup></li> <li>• Health insurance companies should be involved <sup>c</sup></li> <li>• Psychological late effects should be standardised <sup>c</sup></li> <li>• Transition from paediatric to adult care should be interdisciplinary <sup>c</sup></li> <li>• HCPs should prepare SurPass <sup>c</sup></li> <li>• Contact person for late effects should be included <sup>c</sup></li> <li>• Communication with GPs should be improved <sup>c</sup></li> <li>• There should be ownership in the management of information and LTFU care <sup>c</sup></li> <li>• Involvement of case managers in LTFU care <sup>c</sup></li> <li>• Implementation of adult LTFU care centres <sup>c</sup></li> </ul>                                               |

|                |                                                                                                                                                                                                                                                                    |                                                                                                                                                                                                                                                                                                                                                                                                                                                                                                                                                                                                                                                                                                                                                                                                                                                                                                                                                                                                                                                                 |
|----------------|--------------------------------------------------------------------------------------------------------------------------------------------------------------------------------------------------------------------------------------------------------------------|-----------------------------------------------------------------------------------------------------------------------------------------------------------------------------------------------------------------------------------------------------------------------------------------------------------------------------------------------------------------------------------------------------------------------------------------------------------------------------------------------------------------------------------------------------------------------------------------------------------------------------------------------------------------------------------------------------------------------------------------------------------------------------------------------------------------------------------------------------------------------------------------------------------------------------------------------------------------------------------------------------------------------------------------------------------------|
|                | <ul style="list-style-type: none"> <li>• Lack of coordinators between HCPs <sup>f</sup></li> <li>• Lack of recommendations/LTFU care for patients with chronic diseases <sup>f</sup></li> <li>• Lack of psychological follow-up of CCSs <sup>f</sup></li> </ul>    | <ul style="list-style-type: none"> <li>• Use of video consultations in LTFU care <sup>c</sup></li> <li>• Coordination within in LTFU care <sup>c</sup></li> <li>• Uncertainty about what should be done to improve LTFU care until SurPass is implemented <sup>c</sup></li> <li>• Creation of a data base of HCPs in LTFU care <sup>c</sup></li> <li>• Building strong local teams with HCPs who feel locally connected and are in close exchange with the LTFU outpatient clinic <sup>c</sup></li> <li>• Importance of the transition of paediatric care to adult care <sup>d</sup></li> <li>• LTFU should be included nationally and in the cancer plan of each community <sup>f</sup></li> <li>• Knowledge sharing within primary healthcare <sup>f</sup></li> <li>• LTFU consultation in each community in the portfolio of care services <sup>f</sup></li> <li>• Creation of protocols by the regional ministries to increase resources and obligate LTFU care <sup>f</sup></li> <li>• Notifications within digital health systems <sup>f</sup></li> </ul> |
| Time           | <ul style="list-style-type: none"> <li>• Workload too high when the HCPs has to validate the correctness of data sent in FHIR format to CINECA <sup>d</sup></li> </ul>                                                                                             | <ul style="list-style-type: none"> <li>• Clear timeline of when to include which information in the SurPass <sup>c</sup></li> </ul>                                                                                                                                                                                                                                                                                                                                                                                                                                                                                                                                                                                                                                                                                                                                                                                                                                                                                                                             |
| Involved staff | <ul style="list-style-type: none"> <li>• Lack of a contact point for young adult CCSs <sup>c</sup></li> <li>• Doctors for adult CCSs need to be involved in monitoring <sup>e</sup></li> <li>• Concerns about increase of workload of HCPs <sup>f</sup></li> </ul> | <ul style="list-style-type: none"> <li>• Late effects specialists should take the lead in LTFU care <sup>b</sup></li> <li>• Involvement of a contact person for further questions regarding SurPass <sup>b,c</sup></li> <li>• Nationwide list of HCPs for LTFU care should be developed <sup>c</sup></li> <li>• Private practice HCPs should be included in LTFU care <sup>c</sup></li> <li>• Involvement of the family physician is of great importance <sup>f</sup></li> <li>• Hiring data managers for cases prior to EHR <sup>f</sup></li> </ul>                                                                                                                                                                                                                                                                                                                                                                                                                                                                                                            |

|                           |                                                                                                                                                                                                                                                                                                                                                                                                                                                                                                                                                                                                                                                                 |                                                                                                                                                                                                                                                                                                                                                                                                                                                                                                                                                                                                                                                                                                                                                                                                                                                                   |
|---------------------------|-----------------------------------------------------------------------------------------------------------------------------------------------------------------------------------------------------------------------------------------------------------------------------------------------------------------------------------------------------------------------------------------------------------------------------------------------------------------------------------------------------------------------------------------------------------------------------------------------------------------------------------------------------------------|-------------------------------------------------------------------------------------------------------------------------------------------------------------------------------------------------------------------------------------------------------------------------------------------------------------------------------------------------------------------------------------------------------------------------------------------------------------------------------------------------------------------------------------------------------------------------------------------------------------------------------------------------------------------------------------------------------------------------------------------------------------------------------------------------------------------------------------------------------------------|
| Knowledge<br>(about care) | <ul style="list-style-type: none"> <li>• Lack of knowledge of long-term effects among HCPs <sup>c, f</sup></li> <li>• Screening- and LTFU care recommendations unknown <sup>c, f</sup></li> <li>• Uncertainty about what the psychological late effects are <sup>c</sup></li> <li>• Uncertainty about what tools exist for LTFU care <sup>c</sup></li> <li>• Uncertainty about when to inform CCSs about late effects <sup>c</sup></li> <li>• Lack of health education for families <sup>f</sup></li> <li>• Lack of training for different HCPs <sup>f</sup></li> <li>• Lack of knowledge in insurance companies regarding late effects <sup>f</sup></li> </ul> | <ul style="list-style-type: none"> <li>• CCSs should be updated about relevant novel research findings <sup>b</sup></li> <li>• Education about LTFU care for CCSs <sup>c</sup></li> <li>• Sharing information about late effects as soon as possible <sup>c</sup></li> <li>• Oncology education for medical student <sup>c</sup></li> <li>• LTFU care education for oncological paediatricians <sup>c</sup></li> <li>• Information events about LTFU care for GPs <sup>c</sup></li> <li>• Providing informative material/educational options for CCSs about late effects <sup>c</sup></li> <li>• Awareness about LTFU care should be raised by the GPs <sup>d</sup></li> <li>• Semi-annual debriefing meetings between specialists to share information <sup>e</sup></li> <li>• Importance of disease knowledge in children &lt; 16 years <sup>f</sup></li> </ul> |
| Experience                |                                                                                                                                                                                                                                                                                                                                                                                                                                                                                                                                                                                                                                                                 | <ul style="list-style-type: none"> <li>• SurPass is seen as a tool to be aware of wellness and check-ups for CCSs <sup>d</sup></li> </ul>                                                                                                                                                                                                                                                                                                                                                                                                                                                                                                                                                                                                                                                                                                                         |
| Perceived added value     | <ul style="list-style-type: none"> <li>• Uncertainty among centres outside St. Anna if SurPass will add any extra value to LTFU care <sup>a</sup></li> <li>• Uncertainty which stakeholders will benefit from SurPass <sup>a</sup></li> </ul>                                                                                                                                                                                                                                                                                                                                                                                                                   | <ul style="list-style-type: none"> <li>• University Hospital Graz would like to have SurPass implemented <sup>a</sup></li> <li>• Relief of future possible illnesses – SurPass helps to remember following consultations etc. <sup>b</sup></li> <li>• Digital SurPass could be useful when centralised with no additional administrative burden <sup>b</sup></li> <li>• Digital SurPass useful for young CCSs because they will not be dependent on parents <sup>b</sup></li> <li>• SurPass can inform CCSs about the risks, long-term effects and screenings <sup>b</sup></li> <li>• SurPass is expected to be a helpful tool in the transition towards adult care <sup>c</sup></li> </ul>                                                                                                                                                                       |

|                           |                                                                                                                                                                                                                                                                                                                                                                                                                                                                                                                                                                                                                                                                                                                                          |                                                                                                                                                                                                                                                                                                                                                                                                                                                                                                                                                                                                                                                                                                                                                                                                                                                                                                                                                                                       |
|---------------------------|------------------------------------------------------------------------------------------------------------------------------------------------------------------------------------------------------------------------------------------------------------------------------------------------------------------------------------------------------------------------------------------------------------------------------------------------------------------------------------------------------------------------------------------------------------------------------------------------------------------------------------------------------------------------------------------------------------------------------------------|---------------------------------------------------------------------------------------------------------------------------------------------------------------------------------------------------------------------------------------------------------------------------------------------------------------------------------------------------------------------------------------------------------------------------------------------------------------------------------------------------------------------------------------------------------------------------------------------------------------------------------------------------------------------------------------------------------------------------------------------------------------------------------------------------------------------------------------------------------------------------------------------------------------------------------------------------------------------------------------|
|                           |                                                                                                                                                                                                                                                                                                                                                                                                                                                                                                                                                                                                                                                                                                                                          | <ul style="list-style-type: none"> <li>• SurPass is perceived to be helpful to reduce the need to explain late effects <sup>d</sup></li> <li>• Surpass could act as a referral to specialist <sup>e</sup></li> <li>• Convenient for doctors to see aggregated information in SurPass for further treatment decisions <sup>e</sup></li> <li>• Useful to have information concentrated in SurPass <sup>e</sup></li> <li>• SurPass considered useful for research to improve treatment <sup>e</sup></li> </ul>                                                                                                                                                                                                                                                                                                                                                                                                                                                                           |
| Satisfaction with Surpass |                                                                                                                                                                                                                                                                                                                                                                                                                                                                                                                                                                                                                                                                                                                                          | <ul style="list-style-type: none"> <li>• SurPass implementation would benefit from a sound evaluation<sup>a</sup></li> </ul>                                                                                                                                                                                                                                                                                                                                                                                                                                                                                                                                                                                                                                                                                                                                                                                                                                                          |
| SurPass content           | <ul style="list-style-type: none"> <li>• Uncertainty on what psychosocial information is needed or wanted in SurPass <sup>a</sup></li> <li>• SurPass is only focused on health risks instead of prevention <sup>b</sup></li> <li>• Lack of information about minor ailments in SurPass <sup>b</sup></li> <li>• Lack of information about how CCSs can improve their lives themselves (e.g. exercise or lifestyle) <sup>b</sup></li> <li>• Uncertainty about when information is entered into SurPass <sup>b</sup></li> <li>• Uncertainty about how to determine which information should be included in SurPass <sup>c</sup></li> <li>• Uncertainty about the need for oncological and other medical information <sup>f</sup></li> </ul> | <ul style="list-style-type: none"> <li>• Simple but detailed info in SurPass can stop the "catastrophising" <sup>b</sup></li> <li>• Information in SurPass is formulated differently for CCSs and HCPs <sup>b</sup></li> <li>• Preventive screening for possible serious illnesses: automatically planned &amp; arranged by SurPass <sup>b</sup></li> <li>• HCPs easily accessible for CCSs via single point of contact in SurPass <sup>b</sup></li> <li>• SurPass should include positive messages/experiences from more experienced CCSs <sup>b</sup></li> <li>• SurPass should include a mentorship option for CCSs <sup>b</sup></li> <li>• LTFU care should include medical as well as psychological components <sup>b</sup></li> <li>• SurPass could involve a prevention component <sup>b</sup></li> <li>• Important to include psychosocial care aspects in LTFU care <sup>b</sup></li> <li>• SurPass could include guidelines for psychosocial topics <sup>b</sup></li> </ul> |

- 
- Psychosocial components in SurPass should be optional to activate (not standard) <sup>b, c</sup>
  - Nuance is important in SurPass <sup>b</sup>
  - Contact option for psychosocial care within SurPass would be helpful <sup>b, c</sup>
  - Standardised medication plan in the SurPass is desirable <sup>c</sup>
  - SurPass should be a dynamic document linked (and updated) to the development of the child <sup>c</sup>
  - New findings must also be recorded in the SurPass after 30 years <sup>c</sup>
  - SurPass should include a psychological component <sup>a, b, c, d</sup>
  - SurPass should include plain language information for young/cognitive impaired CCSs <sup>c</sup>
  - SurPass should be positively oriented <sup>b, c</sup>
  - A structure in which all information on the course of the disease and LTFU care is brought together and can be found again without difficulty is seen as desirable <sup>c</sup>
  - Importance to distinguish what kind of data and relation to the cancer phase should be entered in SurPass <sup>c</sup>
  - SurPass should include the invisible disabilities and overall welfare of CCSs <sup>d</sup>
  - Updates of recommendations based on individual information is needed <sup>e</sup>
  - Special function within SurPass for continuously monitoring health complications <sup>e</sup>
  - Complete treatment summary converted directly into SurPass would be useful <sup>e</sup>
-

|                |                                                                                                                                                                                                                                                                                                                                                                                                                                                                                                                                                                                                                                                                                                                                                                                  |                                                                                                                                                                                                                                                                                                                                                                                                                                                                                                                                                                                                                                                                             |
|----------------|----------------------------------------------------------------------------------------------------------------------------------------------------------------------------------------------------------------------------------------------------------------------------------------------------------------------------------------------------------------------------------------------------------------------------------------------------------------------------------------------------------------------------------------------------------------------------------------------------------------------------------------------------------------------------------------------------------------------------------------------------------------------------------|-----------------------------------------------------------------------------------------------------------------------------------------------------------------------------------------------------------------------------------------------------------------------------------------------------------------------------------------------------------------------------------------------------------------------------------------------------------------------------------------------------------------------------------------------------------------------------------------------------------------------------------------------------------------------------|
|                |                                                                                                                                                                                                                                                                                                                                                                                                                                                                                                                                                                                                                                                                                                                                                                                  | <ul style="list-style-type: none"> <li>• Notifications for reaching patient milestones or appointments <sup>f</sup></li> <li>• Notifications notifying hospitals to call the CCSS for appointments <sup>f</sup></li> </ul>                                                                                                                                                                                                                                                                                                                                                                                                                                                  |
| <b>Ethical</b> | <ul style="list-style-type: none"> <li>• Uncertainty about who should be able to access SurPass (e.g. parents, HCPs and insurance companies) <sup>a,b,c,f</sup></li> <li>• Uncertainty about who receives SurPass <sup>b</sup></li> <li>• Uncertainty about how impaired CCSs can access SurPass <sup>b,c</sup></li> <li>• Uncertainty about who has access to add data into SurPass <sup>f</sup></li> </ul>                                                                                                                                                                                                                                                                                                                                                                     | <ul style="list-style-type: none"> <li>• SurPass should not be accessible for insurance providers <sup>b,f</sup></li> <li>• Informal care should have access to SurPass <sup>b</sup></li> <li>• Counsellors for CCSs with limited autonomy should have access to SurPass <sup>b</sup></li> <li>• SurPass access rights must be granted by the patient <sup>b,c,e</sup></li> <li>• SurPass is issued at the "5-year follow-up" and then handed over to CCSs or relatives <sup>c</sup></li> <li>• Accessibility of SurPass should be well prepared and implemented <sup>c</sup></li> <li>• Visibility of Surpass for all doctors is permitted by CCSs <sup>e</sup></li> </ul> |
|                | <ul style="list-style-type: none"> <li>• Uncertainty what will happen to the data in SurPass <sup>a</sup></li> <li>• Information can only be registered via the GDA (health authority) - only the GDA is allowed to register in ELGA <sup>a</sup></li> <li>• Uncertainty if CCSs allow SurPass data that benefits others to be shared <sup>a</sup></li> <li>• Data protection of European citizens differs outside the European Union <sup>b</sup></li> <li>• Uncertainty about data retention <sup>b</sup></li> <li>• Validation of data cannot be done automatically <sup>d</sup></li> <li>• Importance of data security and data protection <sup>f</sup></li> <li>• Importance of the geographical location of the data and related security measures <sup>f</sup></li> </ul> | <ul style="list-style-type: none"> <li>• Informed consent by CCSs is needed to add sensitive information in SurPass <sup>b</sup></li> <li>• SurPass should have an option for CCSs to view and conceal sensitive information <sup>a,b,c,e</sup></li> <li>• Need of a control authority to ensure the patient has been informed and that the SurPass has been handed over <sup>c</sup></li> <li>• The patients' consent form could include an option to agree with transferring Surpass to ESPBI <sup>e</sup></li> <li>• Data should be codified <sup>f</sup></li> </ul>                                                                                                     |

|                        |                                                                                                                                                                                                                                                                                                                                                                                                                                                                                                                                  |                                                                                                                                                                                                                                                                                                                                       |
|------------------------|----------------------------------------------------------------------------------------------------------------------------------------------------------------------------------------------------------------------------------------------------------------------------------------------------------------------------------------------------------------------------------------------------------------------------------------------------------------------------------------------------------------------------------|---------------------------------------------------------------------------------------------------------------------------------------------------------------------------------------------------------------------------------------------------------------------------------------------------------------------------------------|
|                        | <ul style="list-style-type: none"> <li>Using patient identifiers for information use outside SurPass (e.g. SIP and DNI) <sup>f</sup></li> </ul>                                                                                                                                                                                                                                                                                                                                                                                  |                                                                                                                                                                                                                                                                                                                                       |
| CCSs' rights           | <ul style="list-style-type: none"> <li>Uncertainty about what happens when parents do not inform their child about SurPass <sup>c</sup></li> </ul>                                                                                                                                                                                                                                                                                                                                                                               | <ul style="list-style-type: none"> <li>Co-design/co-creation involving CCSs is necessary <sup>a</sup></li> <li>CCSs' requests should be included into SurPass <sup>a</sup></li> <li>Autonomy of younger CCSs should be considered <sup>b</sup></li> <li>CCSs would like to see what ESPBI documents look like <sup>e</sup></li> </ul> |
| Anxiety in CCSs        | <ul style="list-style-type: none"> <li>SurPass could cause stress/anxiety/fear <sup>b,c</sup></li> <li>SurPass could lead to over-concern <sup>b,c</sup></li> <li>SurPass could lead to "catastrophising" (every minor thing could be seen as a serious illness) <sup>b,c</sup></li> <li>Anxiety can cause people not to use SurPass <sup>b</sup></li> <li>Uncertainty about when it is the right time to mention late effects <sup>c</sup></li> <li>Anxiety caused by the lack of appropriate LTFU care <sup>f</sup></li> </ul> | <ul style="list-style-type: none"> <li>Dose and repeat the information about late effects to prevent the feeling of being overwhelmed <sup>c</sup></li> </ul>                                                                                                                                                                         |
| CCSs' responsibilities | <ul style="list-style-type: none"> <li>The need for CCSs to know they have to take responsibility for SurPass <sup>f</sup></li> </ul>                                                                                                                                                                                                                                                                                                                                                                                            | <ul style="list-style-type: none"> <li>Care program should be positively oriented and controllable by CCSs themselves <sup>b</sup></li> <li>SurPass will bring empowerment to CCSs because of their own coordination of care <sup>c</sup></li> <li>Advice for CCSs on taking responsibility <sup>c</sup></li> </ul>                   |
| <b>Legal</b>           |                                                                                                                                                                                                                                                                                                                                                                                                                                                                                                                                  |                                                                                                                                                                                                                                                                                                                                       |
| Legal requirements     | <ul style="list-style-type: none"> <li>Importance of site hosting server regarding legal issues <sup>b</sup></li> <li>Communication tailored to CCSs instead of parents when legal age is reached <sup>b</sup></li> <li>Lack of obligation to inform CCSs about late effects <sup>c</sup></li> <li>Uncertainty about how to agree on the exchange of information <sup>f</sup></li> </ul>                                                                                                                                         | <ul style="list-style-type: none"> <li>Informed consent is included into ELGA and should be in SurPass <sup>a</sup></li> <li>SurPass should become accessible when CCSs transfer to adult care <sup>c</sup></li> </ul>                                                                                                                |

|                 |                                       |                                                                                                                                                                                                                                                                                                     |                                                                                                                                                                                                                                                                                                                                         |
|-----------------|---------------------------------------|-----------------------------------------------------------------------------------------------------------------------------------------------------------------------------------------------------------------------------------------------------------------------------------------------------|-----------------------------------------------------------------------------------------------------------------------------------------------------------------------------------------------------------------------------------------------------------------------------------------------------------------------------------------|
|                 |                                       | <ul style="list-style-type: none"> <li>CCSs should have reached the legal age or age 16 to receive SurPass <sup>f</sup></li> </ul>                                                                                                                                                                  |                                                                                                                                                                                                                                                                                                                                         |
|                 | Secondary use of data                 |                                                                                                                                                                                                                                                                                                     | <ul style="list-style-type: none"> <li>Importance of distinction between collecting data for treatment or research objectives <sup>b,c,f</sup></li> <li>Synchronisation of care and research data <sup>c,f</sup></li> </ul>                                                                                                             |
|                 | National regulations                  | <ul style="list-style-type: none"> <li>Strict law regulation- tracking only up to 18 years <sup>e</sup></li> </ul>                                                                                                                                                                                  | <ul style="list-style-type: none"> <li>SurPass should be a recognised document at the national level <sup>d</sup></li> </ul>                                                                                                                                                                                                            |
| <b>Social</b>   | Standard of care                      | <ul style="list-style-type: none"> <li>Need for a clearly defined psychosocial list developed by CCSs at European level <sup>a</sup></li> <li>Uncertainty about how to involve young adults with cancer <sup>c</sup></li> </ul>                                                                     | <ul style="list-style-type: none"> <li>CCSs would like to receive e-mails regarding LTFU care from the clinic <sup>c</sup></li> <li>Creation of LTFU care units with minimum standards <sup>f</sup></li> </ul>                                                                                                                          |
|                 | Involvement of societal organisations | <ul style="list-style-type: none"> <li>Lack of involvement of political institutions <sup>f</sup></li> </ul>                                                                                                                                                                                        | <ul style="list-style-type: none"> <li>Importance of the Parents' Federation to create pressure on LTFU care <sup>f</sup></li> <li>Availability of parents' association as an intermediary between CCSs and HCPs <sup>f</sup></li> <li>Involve global/European organisations to defend insurance equity of CCSs <sup>f</sup></li> </ul> |
|                 | Discrimination towards CCSs           | <ul style="list-style-type: none"> <li>The name "SurPass" could lead to stigmatisation <sup>b</sup></li> <li>Difficulties and differences in insurance for CCSs <sup>f</sup></li> <li>The need for CCSs to be able to opt for the same insurance policies as other citizens <sup>f</sup></li> </ul> |                                                                                                                                                                                                                                                                                                                                         |
| <b>Economic</b> | Institutional resources               | <ul style="list-style-type: none"> <li>Further financial support is needed for implementation of SurPass in Austria <sup>a</sup></li> <li>Concerns about the budget to be able to finalise SurPass project <sup>f</sup></li> </ul>                                                                  |                                                                                                                                                                                                                                                                                                                                         |
|                 | External resources                    | <ul style="list-style-type: none"> <li>Health insurance funds must finance SurPass implementation (Innsbruck) <sup>a</sup></li> </ul>                                                                                                                                                               |                                                                                                                                                                                                                                                                                                                                         |



|                                 |                           |                                                                                                                                                                                                                                                                                                                                                                                                                                                                                                                                                                                                                                                                                                                                                                                                                                           |                                                                                                                                                                                                                                                                                                                                                                                                                                                                                                                                                                                                                                                                                                             |
|---------------------------------|---------------------------|-------------------------------------------------------------------------------------------------------------------------------------------------------------------------------------------------------------------------------------------------------------------------------------------------------------------------------------------------------------------------------------------------------------------------------------------------------------------------------------------------------------------------------------------------------------------------------------------------------------------------------------------------------------------------------------------------------------------------------------------------------------------------------------------------------------------------------------------|-------------------------------------------------------------------------------------------------------------------------------------------------------------------------------------------------------------------------------------------------------------------------------------------------------------------------------------------------------------------------------------------------------------------------------------------------------------------------------------------------------------------------------------------------------------------------------------------------------------------------------------------------------------------------------------------------------------|
| <b>Information<br/>&amp; IT</b> | CCSs' financial burden    | <ul style="list-style-type: none"> <li>CCSs' fear that insurers' knowledge of their situation will lead to a higher financial burden <sup>f</sup></li> </ul>                                                                                                                                                                                                                                                                                                                                                                                                                                                                                                                                                                                                                                                                              |                                                                                                                                                                                                                                                                                                                                                                                                                                                                                                                                                                                                                                                                                                             |
|                                 | Knowledge IT specialists  | <ul style="list-style-type: none"> <li>Uncertainty on how the FSE can be kept updated <sup>d</sup></li> <li>Uncertainty about how to possibly revise the electronic medical record structure <sup>d</sup></li> </ul>                                                                                                                                                                                                                                                                                                                                                                                                                                                                                                                                                                                                                      |                                                                                                                                                                                                                                                                                                                                                                                                                                                                                                                                                                                                                                                                                                             |
|                                 | Data system accessibility | <ul style="list-style-type: none"> <li>Uncertainty about how it is ensured that different file formats stay readable and accessible <sup>c</sup></li> <li>No restriction of visibility of some or part of medical documents in ESPBI system <sup>e</sup></li> </ul>                                                                                                                                                                                                                                                                                                                                                                                                                                                                                                                                                                       | <ul style="list-style-type: none"> <li>Data access from GP/paediatrician needed <sup>c</sup></li> <li>Possibility to make the patient information in VULSK ELI system "sensitive" <sup>e</sup></li> </ul>                                                                                                                                                                                                                                                                                                                                                                                                                                                                                                   |
|                                 | Patient data availability | <ul style="list-style-type: none"> <li>Uncertainty about when data will be put in SurPass <sup>c</sup></li> <li>Incompleteness of data due to missing key attributes <sup>d</sup></li> </ul>                                                                                                                                                                                                                                                                                                                                                                                                                                                                                                                                                                                                                                              | <ul style="list-style-type: none"> <li>Including medication in SurPass is perceived to have no technical difficulties <sup>a</sup></li> <li>Fixed date for creation and delivery is needed <sup>c</sup></li> </ul>                                                                                                                                                                                                                                                                                                                                                                                                                                                                                          |
|                                 | SurPass usability         | <ul style="list-style-type: none"> <li>Uncertainty if CCSs who have been opted out of ELGA also receive SurPass <sup>a</sup></li> <li>Uncertainty if CCSs can add data into SurPass themselves <sup>a</sup></li> <li>Uncertainty about how to lower the threshold to use SurPass <sup>b,c</sup></li> <li>Administrative tasks for CCSs could lead to not using SurPass <sup>b</sup></li> <li>Uncertainty about what should be done if CCSs refuse the SurPass <sup>c</sup></li> <li>Uncertainty on how to update SurPass regarding psychological late effects <sup>c</sup></li> <li>Uncertainty about how SurPass data can be used in other countries <sup>b,c,f</sup></li> <li>Uncertainty if SurPass applies to young adult CCSs <sup>c</sup></li> <li>Doubts regarding the need for internet to access SurPass <sup>f</sup></li> </ul> | <ul style="list-style-type: none"> <li>Cooperation of software producers, technical hospital team and developers is necessary <sup>a</sup></li> <li>Pilot implementation of SurPass is planned for St. Anna <sup>a</sup></li> <li>Implement a SurPass pilot in every PCSP centre <sup>a</sup></li> <li>SurPass should address young CCSs and parents together <sup>b</sup></li> <li>Usability of SurPass abroad <sup>c,d</sup></li> <li>Joint meetings between IT and HCPs in order to test the coding of the live data <sup>d</sup></li> <li>After discharge CCSs should still have access to SurPass <sup>f</sup></li> <li>Traceability of what is written in SurPass and by whom <sup>f</sup></li> </ul> |

|                            |                                                                                                                                                                                                                                                                                                                                                                                                                                                                                                                                                                                                                                                                                                                                                                                                                                                                                                                                                                                                               |                                                                                                                                                                                                                                                                                                                                                                                                                                                                                                                                                                                                                                                                                                                                                                                                                                                                                                                                                                                                                                                                                                                                                                                                                                                                                                                                                                                    |
|----------------------------|---------------------------------------------------------------------------------------------------------------------------------------------------------------------------------------------------------------------------------------------------------------------------------------------------------------------------------------------------------------------------------------------------------------------------------------------------------------------------------------------------------------------------------------------------------------------------------------------------------------------------------------------------------------------------------------------------------------------------------------------------------------------------------------------------------------------------------------------------------------------------------------------------------------------------------------------------------------------------------------------------------------|------------------------------------------------------------------------------------------------------------------------------------------------------------------------------------------------------------------------------------------------------------------------------------------------------------------------------------------------------------------------------------------------------------------------------------------------------------------------------------------------------------------------------------------------------------------------------------------------------------------------------------------------------------------------------------------------------------------------------------------------------------------------------------------------------------------------------------------------------------------------------------------------------------------------------------------------------------------------------------------------------------------------------------------------------------------------------------------------------------------------------------------------------------------------------------------------------------------------------------------------------------------------------------------------------------------------------------------------------------------------------------|
| System<br>integration      | <ul style="list-style-type: none"> <li>• Different HIS systems in Austria - adaptations necessary for each centre <sup>a</sup></li> <li>• COZO, KUL differs from EPD <sup>b</sup></li> <li>• Uncertainty about the integration of different data formats <sup>c, f</sup></li> <li>• Uncertainty about how, when and by whom data is entered in SurPass <sup>c</sup></li> <li>• Data format not standardised across HIS <sup>c</sup></li> <li>• Uncertainty on how to integrate the SurPass with the FSE (which is a document of the PNNR) <sup>d</sup></li> <li>• Documents from the hospital can only be sent to the ESF by PDF format <sup>d</sup></li> <li>• Current development of the ESF in the PNNR which currently provides for the CDA2 format, while the project provides for FHIR <sup>d</sup></li> <li>• Uncertainty about how the SurPass is updated <sup>c,d,f</sup></li> <li>• Uncertainty about system integration between national and European health systems <sup>b,c,d,f</sup></li> </ul> | <ul style="list-style-type: none"> <li>• Pilot for linking all HIS in Austria <sup>a</sup></li> <li>• Every hospital needs to set up a CDA to have common basis for linking all HIS <sup>a</sup></li> <li>• Austria is working on implementation of a common CDA to finish within 1-2 years <sup>a</sup></li> <li>• Linking SurPass and Cancer Registries could avoid duplication <sup>b</sup></li> <li>• The possibility of combining SurPass with the Health Card <sup>c</sup></li> <li>• Automatic filing of SurPass from HIS <sup>a,b,c,d,e,f</sup></li> <li>• Automatic transfer of data from SurPass to HIS <sup>a,b,c,d,e,f</sup></li> <li>• FHIR for data exchange and networking of clinics has to be used <sup>c</sup></li> <li>• HL7 FHIR offers possibility to generate data to GP <sup>c</sup></li> <li>• In the future documents of the citizen will be visible to the health professionals in Liguria (EHR) <sup>d</sup></li> <li>• The application formats the standardised documents in CDA2 <sup>d</sup></li> <li>• Development of software to make PDF files available to the ESF <sup>d</sup></li> <li>• Integration of multiple platforms to use SurPass <sup>f</sup></li> <li>• Integration with EHR <sup>f</sup></li> <li>• Standardisation of data <sup>f</sup></li> <li>• Facilitating the software and data collection correctly <sup>f</sup></li> </ul> |
| Knowledge<br>about SurPass | <ul style="list-style-type: none"> <li>• Uncertainty about who should be contacted about SurPass use (CCSs/parents?) <sup>b</sup></li> <li>• Uncertainty on how SurPass will be understandable for young children <sup>c</sup></li> </ul>                                                                                                                                                                                                                                                                                                                                                                                                                                                                                                                                                                                                                                                                                                                                                                     | <ul style="list-style-type: none"> <li>• Importance of disclosure regarding SurPass information to various HCPs <sup>b</sup></li> <li>• Consultation about SurPass should be provided <sup>b</sup></li> <li>• Send information about and together with SurPass <sup>c</sup></li> </ul>                                                                                                                                                                                                                                                                                                                                                                                                                                                                                                                                                                                                                                                                                                                                                                                                                                                                                                                                                                                                                                                                                             |

|                |                                                                                                                                                                                                                                                                                                                                                                                                                                                                                    |                                                                                                                                                                                                                                                                                                                                                                                                                                                                                                                                                                                                                                                                                                                                                                                                                                     |
|----------------|------------------------------------------------------------------------------------------------------------------------------------------------------------------------------------------------------------------------------------------------------------------------------------------------------------------------------------------------------------------------------------------------------------------------------------------------------------------------------------|-------------------------------------------------------------------------------------------------------------------------------------------------------------------------------------------------------------------------------------------------------------------------------------------------------------------------------------------------------------------------------------------------------------------------------------------------------------------------------------------------------------------------------------------------------------------------------------------------------------------------------------------------------------------------------------------------------------------------------------------------------------------------------------------------------------------------------------|
|                |                                                                                                                                                                                                                                                                                                                                                                                                                                                                                    | <ul style="list-style-type: none"> <li>Promotion material should provide information about SurPass in simple language <sup>b,c,d,f</sup></li> <li>Information brochures to explain SurPass for older CCSs <sup>c</sup></li> <li>Pixie-books for younger CCSs to explain SurPass <sup>c</sup></li> <li>Education for HCPs about SurPass and its importance to CCSs <sup>e</sup></li> <li>Learning how to use SurPass for HCPs and CCSs <sup>f</sup></li> </ul>                                                                                                                                                                                                                                                                                                                                                                       |
| SurPass format | <ul style="list-style-type: none"> <li>Uncertainty about how blind CCSs can access the data <sup>c</sup></li> <li>Uncertainty about what language should be used in SurPass for migrated CCSs <sup>c</sup></li> <li>Uncertainty about a suitable target medium (folder, stick, PDF) <sup>c</sup></li> <li>Uncertainty about the (time) structure of information which enters SurPass <sup>c</sup></li> <li>Uncertainty about who will make SurPass digital <sup>d</sup></li> </ul> | <ul style="list-style-type: none"> <li>The name SurPass could be changed to "care program" <sup>b</sup></li> <li>Data should be available as a PDF document rather than in paper <sup>c</sup></li> <li>Storing SurPass electronically as a PDF document is seen as positive <sup>c</sup></li> <li>SurPass should include all common languages to choose from <sup>c, d, f</sup></li> <li>SurPass could use a multilingual approach (national language vs English) <sup>c</sup></li> <li>SurPass should also still be available on paper <sup>c</sup></li> <li>Bilingual double SurPass <sup>c</sup></li> <li>Surpass should be an official document <sup>d</sup></li> <li>SurPass should include the possibility to use the QR code/ link directly with a PDF that CCSs can open to consult the legislation <sup>d</sup></li> </ul> |

<sup>a</sup> Austria (St. Anna Kinderkrebsforschung), <sup>b</sup> Belgium (Katholieke Universiteit Leuven), <sup>c</sup> Germany (UMC Mainz), <sup>d</sup> Italy (Istituto Giannina Gaslini), <sup>e</sup> Lithuania (Viesoji Istaiga Vilniaus Universiteto Ligonine Santaros Klinikos) and <sup>f</sup> Spain (Fundación para la Investigación del Hospital Universitario la Fe de la Comunidad Valenciana). Abbreviations: CCSs; childhood and adolescent cancer survivors, CINECA; supercomputing centre for scientific research in Italy, COZO; Collaboratief Zorgplatform (Collaborative Care Platform), DNI; Documento Nacional de Identidad (National Identity Document), EHR; electronic health records, ELGA; electronic health system in Austria, EPD; elektronisch patiëntendossier (electronic patient file), ESF; Italian Healthcare System, ESPBI; Electronic Health Services, EU; Europe, FHIR; Fast Healthcare Interoperability Resources, FSE; Fascicolo Sanitario Elettronico (Electronic Health Record), GDA; health

authority, GPs; general practitioners, HCPs; healthcare professional, HIS; Hospital Information Systems, KUL; Katholieke Universiteit België, LTFU; long-term follow-up, PNNR; Piano Nazionale di Ripresa e Resilienza (National Recovery and Resilience Plan), SIP; Session Initiation Protocol, St. Anna; St. Anna Kinderkrebsforschung, SurPass; Survivorship Passport.
